# Supplementary material
Source: publisher figshare collection journal article supplement (https://asha.figshare.com/articles/dataset/_/26499271)
Supplement: Supplementary file 1 [file 2]

## Supplemental Material S2. Excerpt of collaborative commentary.

@G: Important\_Event

5 INV: www . ▶  
6 INV: so † thinking back can you tell me a story about something important that has happened to you ? ▶  
7 INV: it could be happy or sad &-um from when you were a kid or more recently . ▶  
8 PAR: &-um &-um well † there's a few things . ▶  
9 PAR: I [/] &-um I [//] well † what sort of thing are you referring to ? ▶  
10 PAR: anything at all ? ▶  
11 INV: yeah † any event you can tell me a bit about . ▶  
12 C PAR: well † I [//] &-um when I resigned from Qantas <that was> [//] it was both happy and sad . ▶

Utterance 12 to 12:  
[REDACTED] EC E1

13 PAR: because [//] even sitting here right now I would still would love to be working on aircraft . ▶  
14 C PAR: but living in Sydney and then working for Qantas was becoming +... ▶  
15 PAR: and as it's +//. ▶  
16 PAR: &-chuckles you've heard the news . ▶  
17 PAR: it's getting worse . ▶  
18 C PAR: so † <that was a> [/] that was a major thing that happened to me in my life . ▶  
19 C PAR: and [//] well † get right back to when I got that job . ▶  
20 C PAR: I\_mean that was a major thing to happen you\_know to get the job . ▶  
21 PAR: and &-um &-th they only took three hundred and twenty people out\_of ten thousand or something they interviewed . ▶  
22 PAR: so +... ▶  
23 INV: wow . ▶  
24 PAR: <it was> [//] &-um so † yeah † <that was> [/] that was a big [/] &+e big event . ▶  
25 C PAR: and &-um I would have bought this house . ▶  
26 C PAR: that was a big event too . ▶  
27 PAR: twice . ▶  
28 PAR: because I bought it with my partner a the time . ▶  
29 C PAR: and then when she took off and then I bought her out . ▶  
30 PAR: so [//] yeah † so I've done it twice . ▶  
31 C PAR: &-laughs &-uh hell † and [/] and her taking off was [//] as it turns out was the best thing that ever happened to me . ▶

@G: Important\_Event

4 INV: &-um okay † now we're going to ask you to do a few more things where you need to talk . ▶  
5 INV: please talk as much as you can about each one because we're really interested in knowing about your communication . ▶  
6 PAR: okay . ▶  
7 INV: thinking back can you tell me a story about something important that happened to you in your life ? ▶  
8 INV: it could be happy or sad or from any time from when you were a kid or more recently . ▶  
9 PAR: okay † &-um happy or sad . ▶  
10 C PAR: well † look † a happy occasion my wedding day to FirstnameA &-um which was &-uh about ten or eleven years ago . ▶

Utterance 10 to 10:  
[REDACTED] E1 OC OT

11 C PAR: &-um we didn't believe in a church wedding . ▶  
12 PAR: we [/] &-um we went for a garden service . ▶  
13 PAR: &-uh we &-uh used &-uh one of the harbor side parks &-um in the eastern suburbs . ▶  
14 C PAR: and &-uh FirstnameA arrived which I didn't know about beforehand but she arrived by water taxi &-um with her father . ▶  
15 PAR: and &-uh she looked beautiful on the day . ▶  
16 PAR: and &-um it wasn't a perfect day but it was &-um certainly &-um a nice day to be in the harbor and out and about . ▶  
17 C PAR: and &-uh I remember her coming up the [/] &-uh the steps &-uh from the water taxi up . ▶  
18 C PAR: and I was so proud . ▶  
19 PAR: &-um and &-uh so that was special . ▶  
20 PAR: and &-uh I believe my friends enjoyed it as much . ▶  
21 PAR: the photos were really warm and rich from that day . ▶  
22 PAR: and then we went . ▶  
23 C PAR: and &-um we had our reception at a restaurant &-uh called [REDACTED] at the time which was down below the Anzac bridge . ▶  
24 PAR: and it wasn't too far for people to drive . ▶  
25 PAR: and &-uh <we had> [/] &-um we had a <band there> [//] music band . ▶  
26 PAR: &-um it was great food . ▶  
27 C PAR: and &-uh it was &-uh a memorable day . ▶  
28 C PAR: &-um and [/] and then I remember the dance that FirstnameA and I did &-um was a salsa dance . ▶  
29 PAR: &-um I got them to put on a salsa track . ▶  
30 PAR: and &-um we did a little bit of &-um salsa dancing which I was very keen on at the time . ▶  
31 PAR: and &-um that was &-uh a real highlight for me too . ▶  
32 C PAR: yeah † so † that was &-um a story of a happy time . ▶  
33 INV: thank\_you that was lovely thanks for sharing that . ▶
