# Supplementary material
Source: publisher figshare collection journal article supplement (https://asha.figshare.com/articles/dataset/_/26499271)
Supplement: Supplementary file 2 [file 2]

## Supplemental Material S1. STROBE Checklist – Cohort Studies.

|                          | Item No | Recommendation                                                                                                                                                                                                                                                                                                         | Page No                                       |
|--------------------------|---------|------------------------------------------------------------------------------------------------------------------------------------------------------------------------------------------------------------------------------------------------------------------------------------------------------------------------|-----------------------------------------------|
| Title and abstract       | 1       | (a) Indicate the study’s design with a commonly used term in the title or the abstract                                                                                                                                                                                                                                 | 3064                                          |
|                          |         | (b) Provide in the abstract an informative and balanced summary of what was done and what was found                                                                                                                                                                                                                    | 3064                                          |
| Introduction             |         |                                                                                                                                                                                                                                                                                                                        |                                               |
| Background/rationale     | 2       | Explain the scientific background and rationale for the investigation being reported                                                                                                                                                                                                                                   | 3065–3067                                     |
| Objectives               | 3       | State specific objectives, including any prespecified hypotheses                                                                                                                                                                                                                                                       | 3067                                          |
| Methods                  |         |                                                                                                                                                                                                                                                                                                                        |                                               |
| Study design             | 4       | Present key elements of study design early in the paper                                                                                                                                                                                                                                                                | 3067                                          |
| Setting                  | 5       | Describe the setting, locations, and relevant dates, including periods of recruitment, exposure, follow-up, and data collection                                                                                                                                                                                        | 3067–3068                                     |
| Participants             | 6       | (a) Give the eligibility criteria, and the sources and methods of selection of participants. Describe methods of follow-up<br>(b) For matched studies, give matching criteria and number of exposed and unexposed                                                                                                      | 3067–3068<br>-                                |
| Variables                | 7       | Clearly define all outcomes, exposures, predictors, potential confounders, and effect modifiers. Give diagnostic criteria, if applicable                                                                                                                                                                               | 3067–3068                                     |
| Data sources/measurement | 8*      | For each variable of interest, give sources of data and details of methods of assessment (measurement). Describe comparability of assessment methods if there is more than one group                                                                                                                                   | 3067–3068                                     |
| Bias                     | 9       | Describe any efforts to address potential sources of bias                                                                                                                                                                                                                                                              | -                                             |
| Study size               | 10      | Explain how the study size was arrived at                                                                                                                                                                                                                                                                              | -                                             |
| Quantitative variables   | 11      | Explain how quantitative variables were handled in the analyses. If applicable, describe which groupings were chosen and why                                                                                                                                                                                           | 3068                                          |
| Statistical methods      | 12      | (a) Describe all statistical methods, including those used to control for confounding<br>(b) Describe any methods used to examine subgroups and interactions<br>(c) Explain how missing data were addressed<br>(d) If applicable, explain how loss to follow-up was addressed<br>(e) Describe any sensitivity analyses | 3068–3069<br>-<br>3067–3068<br>3067–3068<br>- |
| Results                  |         |                                                                                                                                                                                                                                                                                                                        |                                               |
| Participants             | 13*     | (a) Report numbers of individuals at each stage of study—eg numbers potentially eligible, examined for eligibility, confirmed eligible, included in the study, completing follow-up, and analysed<br>(b) Give reasons for non-participation at each stage<br>(c) Consider use of a flow diagram                        | -<br>-<br>-                                   |
| Descriptive data         | 14*     | (a) Give characteristics of study participants (eg demographic, clinical, social) and information on exposures and potential confounders<br>(b) Indicate number of participants with missing data for each variable of interest<br>(c) Summarise follow-up time (eg, average and total amount)                         | 3067–3068<br>-<br>-                           |

|                          |     |                                                                                                                                                                                                              |            |
|--------------------------|-----|--------------------------------------------------------------------------------------------------------------------------------------------------------------------------------------------------------------|------------|
| Outcome data             | 15* | Report numbers of outcome events or summary measures over time                                                                                                                                               | 3068       |
| Main results             | 16  | (a) Give unadjusted estimates and, if applicable, confounder-adjusted estimates and their precision (eg, 95% confidence interval). Make clear which confounders were adjusted for and why they were included | 3070–3074  |
|                          |     | (b) Report category boundaries when continuous variables were categorized                                                                                                                                    | -          |
|                          |     | (c) If relevant, consider translating estimates of relative risk into absolute risk for a meaningful time period                                                                                             | -          |
| Other analyses           | 17  | Report other analyses done—eg analyses of subgroups and interactions, and sensitivity analyses                                                                                                               | -          |
| <b>Discussion</b>        |     |                                                                                                                                                                                                              |            |
| Key results              | 18  | Summarise key results with reference to study objectives                                                                                                                                                     | -          |
| Limitations              | 19  | Discuss limitations of the study, taking into account sources of potential bias or imprecision. Discuss both direction and magnitude of any potential bias                                                   | 3074, 3078 |
| Interpretation           | 20  | Give a cautious overall interpretation of results considering objectives, limitations, multiplicity of analyses, results from similar studies, and other relevant evidence                                   | 3076, 3078 |
| Generalisability         | 21  | Discuss the generalisability (external validity) of the study results                                                                                                                                        | 3076       |
| <b>Other information</b> |     |                                                                                                                                                                                                              |            |
| Funding                  | 22  | Give the source of funding and the role of the funders for the present study and, if applicable, for the original study on which the present article is based                                                | 3067       |

**Note:** An Explanation and Elaboration article discusses each checklist item and gives methodological background and published examples of transparent reporting. The STROBE checklist is best used in conjunction with this article (freely available on the Web sites of PLoS Medicine at <http://www.plosmedicine.org/>, Annals of Internal Medicine at <http://www.annals.org/>, and Epidemiology at <http://www.epidem.com/>). Information on the STROBE Initiative is available at <http://www.strobe-statement.org>.

Supplemental Material S2. Excerpt of collaborative commentary.

@G: Important\_Event

5

INV: www . ▶

6

INV: so † thinking back can you tell me a story about something important that has happened to you ? ▶

7

INV: it could be happy or sad &-um from when you were a kid or more recently . ▶

8

PAR: &-um &-um well † there's a few things . ▶

9

PAR: I [/] &-um I [/] well † what sort of thing are you referring to ? ▶

10

PAR: anything at all ? ▶

11

INV: yeah † any event you can tell me a bit about . ▶

12

C PAR: well † I [/] &-um when I resigned from Qantas <that was> [/] it was both happy and sad . ▶

Utterance 12 to 12:

EC

E1

13

PAR: because [/] even sitting here right now I would still would love to be working on aircraft . ▶

14

C PAR: but living in Sydney and then working for Qantas was becoming +... ▶

15

PAR: and as it's +//. ▶

16

PAR: &=chuckles you've heard the news . ▶

17

PAR: it's getting worse . ▶

18

C PAR: so † <that was a> [/] that was a major thing that happened to me in my life . ▶

19

C PAR: and [/] well † get right back to when I got that job . ▶

20

C PAR: I\_mean that was a major thing to happen you\_know to get the job . ▶

21

PAR: and &-um &+th they only took three hundred and twenty people out\_of ten thousand or something they interviewed . ▶

22

PAR: so +... ▶

23

INV: wow . ▶

24

PAR: <it was> [/] &-um so † yeah † <that was> [/] that was a big [/] &+e big event . ▶

25

C PAR: and &-um I would have bought this house . ▶

26

C PAR: that was a big event too . ▶

27

PAR: twice . ▶

28

PAR: because I bought it with my partner a the time . ▶

29

C PAR: and then when she took off and then I bought her out . ▶

30

PAR: so [/] yeah † so I've done it twice . ▶

31

C PAR: &=laughs &-uh hell † and [/] and her taking off was [/] as it turns out was the best thing that ever happened to me . ▶

@G: Important\_Event

4

INV: &-um okay † now we're going to ask you to do a few more things where you need to talk . ▶

5

INV: please talk as much as you can about each one because we're really interested in knowing about your communication . ▶

6

PAR: okay . ▶

7

INV: thinking back can you tell me a story about something important that happened to you in your life ? ▶

8

INV: it could be happy or sad or from any time from when you were a kid or more recently . ▶

9

PAR: okay † &-um happy or sad . ▶

10

C PAR: well † look † a happy occasion my wedding day to FirstNameA &-um which was &-uh about ten or eleven years ago . ▶

Utterance 10 to 10:

E1

OC

OT

11

C PAR: &-um we didn't believe in a church wedding . ▶

12

PAR: we [/] &-um we went for a garden service . ▶

13

PAR: &-uh we &-uh used &-uh one of the harbor side parks &-um in the eastern suburbs . ▶

14

C PAR: and &-uh FirstNameA arrived which I didn't know about beforehand but she arrived by water taxi &-um with her father . ▶

15

PAR: and &-uh she looked beautiful on the day . ▶

16

PAR: and &-um it wasn't a perfect day but it was &-um certainly &-um a nice day to be in the harbor and out and about . ▶

17

C PAR: and &-uh I remember her coming up the [/] &-uh the steps &-uh from the water taxi up . ▶

18

C PAR: and I was so proud . ▶

19

PAR: &-um and &-uh so that was special . ▶

20

PAR: and &-uh I believe my friends enjoyed it as much . ▶

21

PAR: the photos were really warm and rich from that day . ▶

22

PAR: and then we went . ▶

23

C PAR: and &-um we had our reception at a restaurant &-uh called ██████████ at the time which was down below the Anzac bridge . ▶

24

PAR: and it wasn't too far for people to drive . ▶

25

PAR: and &-uh <we had> [/] &-um we had a <band there> [/] music band . ▶

26

PAR: &-um it was great food . ▶

27

C PAR: and &-uh it was &-uh a memorable day . ▶

28

C PAR: &-um and [/] and then I remember the dance that FirstNameA and I did &-um was a salsa dance . ▶

29

PAR: &-um I got them to put on a salsa track . ▶

30

PAR: and &-um we did a little bit of &-um salsa dancing which I was very keen on at the time . ▶

31

PAR: and &-um that was &-uh a real highlight for me too . ▶

32

C PAR: yeah † so † that was &-um a story of a happy time . ▶

33

INV: thank\_you that was lovely thanks for sharing that . ▶
