# Supplementary material
Source: publisher figshare collection journal article supplement (https://asha.figshare.com/articles/dataset/_/26499271)
Supplement: Supplementary file 3 [file 2]

### Supplemental Material S3. Examples of macrolinguistic recount coding.

| Orientation/setting – includes the character [OC], location [OL], time [OT] and other [OO]                                                                                                                                                                                                                                                                                                                                                                                                                                                                                                                                                                                                                                                       | Initiating event [IE] –                                                                                                                                                                                                                                                                                                                                                                                                                                                                        | Events [E] – Series of events. Multiple events were coded sequentially (e.g. E1, E2)                                                                                                                                                                                                                                                                                                                                                                                                                                                                                        | Evaluative comments [EC]                                                                                                                                                                                                                                                                                                                                                                                                                                                                                                                                                                                                                                           | Conclusion [Conc]                                                                                                                                                                                                                                                                                                                                                                                                                                                                                                                |
|--------------------------------------------------------------------------------------------------------------------------------------------------------------------------------------------------------------------------------------------------------------------------------------------------------------------------------------------------------------------------------------------------------------------------------------------------------------------------------------------------------------------------------------------------------------------------------------------------------------------------------------------------------------------------------------------------------------------------------------------------|------------------------------------------------------------------------------------------------------------------------------------------------------------------------------------------------------------------------------------------------------------------------------------------------------------------------------------------------------------------------------------------------------------------------------------------------------------------------------------------------|-----------------------------------------------------------------------------------------------------------------------------------------------------------------------------------------------------------------------------------------------------------------------------------------------------------------------------------------------------------------------------------------------------------------------------------------------------------------------------------------------------------------------------------------------------------------------------|--------------------------------------------------------------------------------------------------------------------------------------------------------------------------------------------------------------------------------------------------------------------------------------------------------------------------------------------------------------------------------------------------------------------------------------------------------------------------------------------------------------------------------------------------------------------------------------------------------------------------------------------------------------------|----------------------------------------------------------------------------------------------------------------------------------------------------------------------------------------------------------------------------------------------------------------------------------------------------------------------------------------------------------------------------------------------------------------------------------------------------------------------------------------------------------------------------------|
| <p><b>Participant 22, Line 28 (12 months)</b><br/>my [/] my love of motorcycles &lt;when I was&gt; [/] when I was &amp;-uh (.) growing up &amp;-um on my auntie's farm in Galston (<b>example of [OL], also coded as [E1]</b>)</p> <p><b>Participant 26, Line 42 (12 months)</b><br/>&amp;-um I guess &amp;-uh one of the funny ones , when I was about (.) seven years old &amp;-um I had a hernia ([OT], <b>example of E1 as well</b>)</p> <p><b>Participant 31, Line 43 (12 months)</b><br/>oh ‡ (..) &amp;-uh (.) &amp;-uh well ‡ I think the most recent thing that happened is the change of the law [OO]</p> <p><b>Participant 30, Line 30 (12 months)</b><br/>my fiancée and I went over to Singapore to watch Formula_one [OC] [OL]</p> | <p><b>Participant 21, Line 40 (12 months)</b><br/>&lt;we had&gt; [/] we had a [/] &amp;-um a relationship back in the seventies.(<b>also coded as [OT] as well</b>)</p> <p><b>Participant 22, Line 38 (12 months)</b><br/>and [/] &amp;-uh but unfortunately &amp;-um it hasn't ended well with motorcycling .</p> <p><b>Participant 43, Line 6 (24 months)</b><br/>well ‡ recently &amp;-um I [/] back in November last year I got all medically cleared and was allowed to drive again .</p> | <p><b>Participant 13, Line 34 (12 months)</b><br/>well ‡ I would say one of the sad one just my &amp;-um grandfather passed away not long ago. (Example coding of E1)</p> <p><b>Participant 22, Line (12 months)</b><br/>one of the things that got me (.) started in motorcycles or began sort_of my [/] my love of motorcycles &lt;when I was&gt; [/] when I was &amp;-uh (.) growing up &amp;-um on my auntie's farm in Galston [E1].....it's [/] you_know I [/] I totally blame this other person for this accident [E2] (<b>example coding of multiple events</b>)</p> | <p><b>Participant 22, Line 92 (6 months)</b><br/>and &lt;I don't&gt; [/] I can't think of anything else that has happened to me as an adult that has changed my perspective as thoroughly and as deeply as that did .</p> <p><b>Participant 3, Line 30 (12 months)</b><br/>&amp;-um (.) went [/] &amp;-um it was nice and relaxing by pools and beaches and eating out constantly .</p> <p><b>Participant 52, Lines 250-254 (24 months)</b><br/><b>PAR:</b> but there's a_lot of things behind the [/] the scenes that you don't realize until they're actually gone.<br/><b>PAR:</b> &amp;-um you really think you know them.<br/><b>PAR:</b> but you don't .</p> | <p><b>Participant 22, Line 84 (6 months)</b><br/>but for me what that experience did was it made me realize just how tenuous existence is and how unimportant I can be</p> <p><b>Participant 13, Line 45-46</b><br/>well ‡ the funeral was pretty sad but you_know that's part of life (<b>also coded as [EC] as well</b>)</p> <p><b>Participant 22, Line 42 (12 months)</b><br/>but I hope my leg will eventually be strong enough where I'll be able to bend my knee to the point where I can you_know ride a bike again .</p> |
