# Supplementary material
Source: publisher figshare collection journal article supplement (https://asha.figshare.com/articles/dataset/_/26499271)
Supplement: Supplementary file 4 [file 2]

## **Supplemental Material S4.** Coding examples.

### *Childhood Events*

PAR: uh I'd probably go back to um uh my childhood

PAR: and I think I might have mentioned this story last time

PAR: but um uh it made quite an impact on me

PAR: my father um had uh been recognized in the um the uh not the Australian Medals which have been pretty controversial lately with uh Tony Abbott

PAR: but um uh I think the Queen's um awards for um OBE's and NBE's and so forth

PAR: so he was awarded um an OBE

PAR: and I was probably seven or eight at the time

PAR: and it made a big impression on me

### *Family and Relationships*

PAR: well look a happy occasion my wedding day to Name and -um which was about uh ten or eleven years ago

PAR: and uh I remember her coming up the uh the steps from the water taxi up and I was so proud

PAR: and so that was special and uh I believe my friends enjoyed it as much

### *Career and Education*

PAR: I had gotten promoted to being employment consultant

PAR: um and yeah I was working as an employment consultant

PAR: and I felt happy that I was setting up something to be a career for me

PAR: not just a job but a career

*Grief and Loss*

PAR: okay um my mother's illness was um a very um important stage in my life

PAR: um I think my mother was relatively young at sixty five when she passed away of cancer

PAR: um and uh she was diagnosed

PAR: and um she had an operation which was a little bit too late as it happens for removal of a section of her bowel

PAR: uh she went into remission for a period of a good twelve months

PAR: and then she had secondaries

PAR: and um I was busy establishing my career at the time

PAR: my father was um more able to spend time which was good

PAR: and uh I think um how we handled it as a family, how my mother handled it and how my father handled it are all um a source of um um great curiosity for me and great understanding of how my life's come together and how I am what I am

PAR: and I think it had uh a big influence on me at the time and still does underneath it all
